# Supplementary material for: Cryptic Biological Invasions: a General Model of Hybridization
Source: PubMed Central journal article supplement (PMC5799175; doi:10.1038/s41598-018-20543-6), 2018-02-05
Supplement: 41598_2018_20543_MOESM1_ESM.pdf [file 41598_2018_20543_MOESM1_ESM.pdf]

**Scientific Reports**

# **Supporting information**

## **Cryptic Biological Invasions: a General Model of Hybridization**

Claudio S. Quilodrán, Frédéric Austerlitz, Mathias Currat, Juan I. Montoya-Burgos

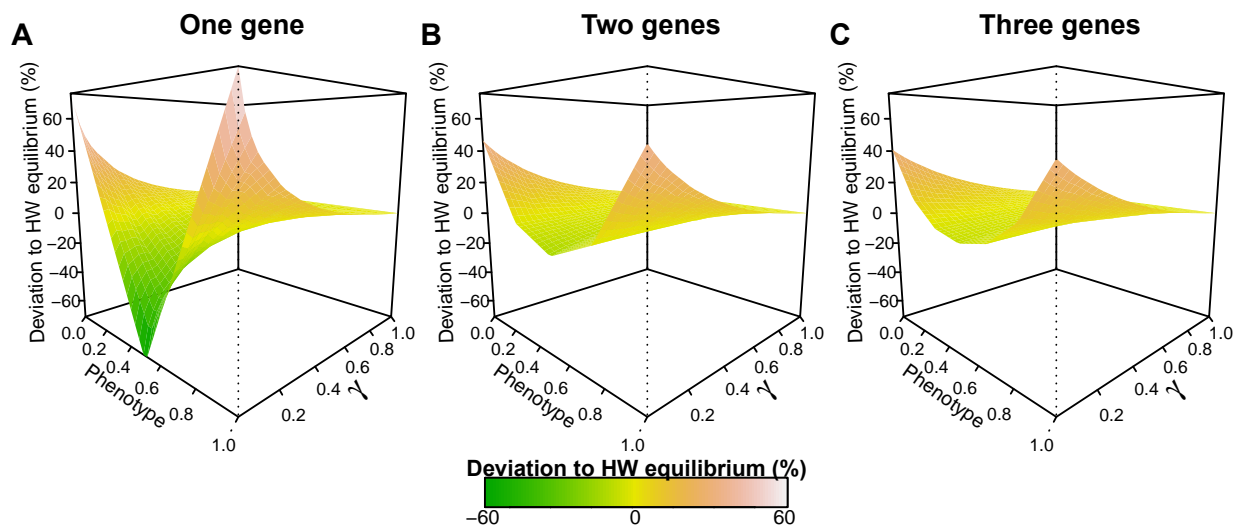

**Figure S1.** The effect of different number of simulated genes on the deviation to the Hardy-Weinberg (HW) equilibrium reached at the time of frequencies in equilibrium. We explore values of interbreeding success rate ranging from rare hybridization success ( $\gamma = 0.01$ ) to a panmictic mating system ( $\gamma = 1$ ). The data are exposed after 150 generations of genomic mixing.

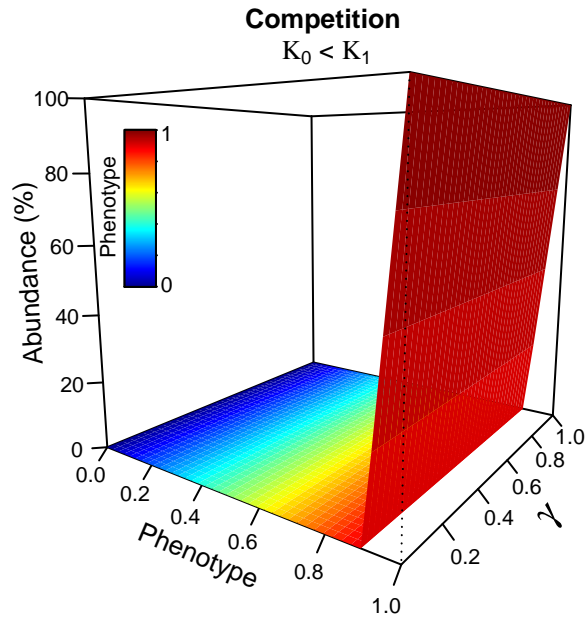

**Figure S2.** Density-dependent demographic parameters influencing the landscape of observed phenotypes. The phenotypic landscape is extrapolated from the contribution five additive genes ( $n_L = 5$ ). We show the effect of interspecific competition ( $\alpha_{01} = \alpha_{10} \neq 0$ ) with unequal carrying capacities between the two parental species ( $K_1 = 1.5K_0$ ). We explored various levels of interbreeding success rate, from rare hybridization success ( $\gamma = 0.01$ ) to a panmictic mating system ( $\gamma = 1$ ). The data are presented after 100 generations of independent evolution and 150 generations of hybridization (250 total generations)

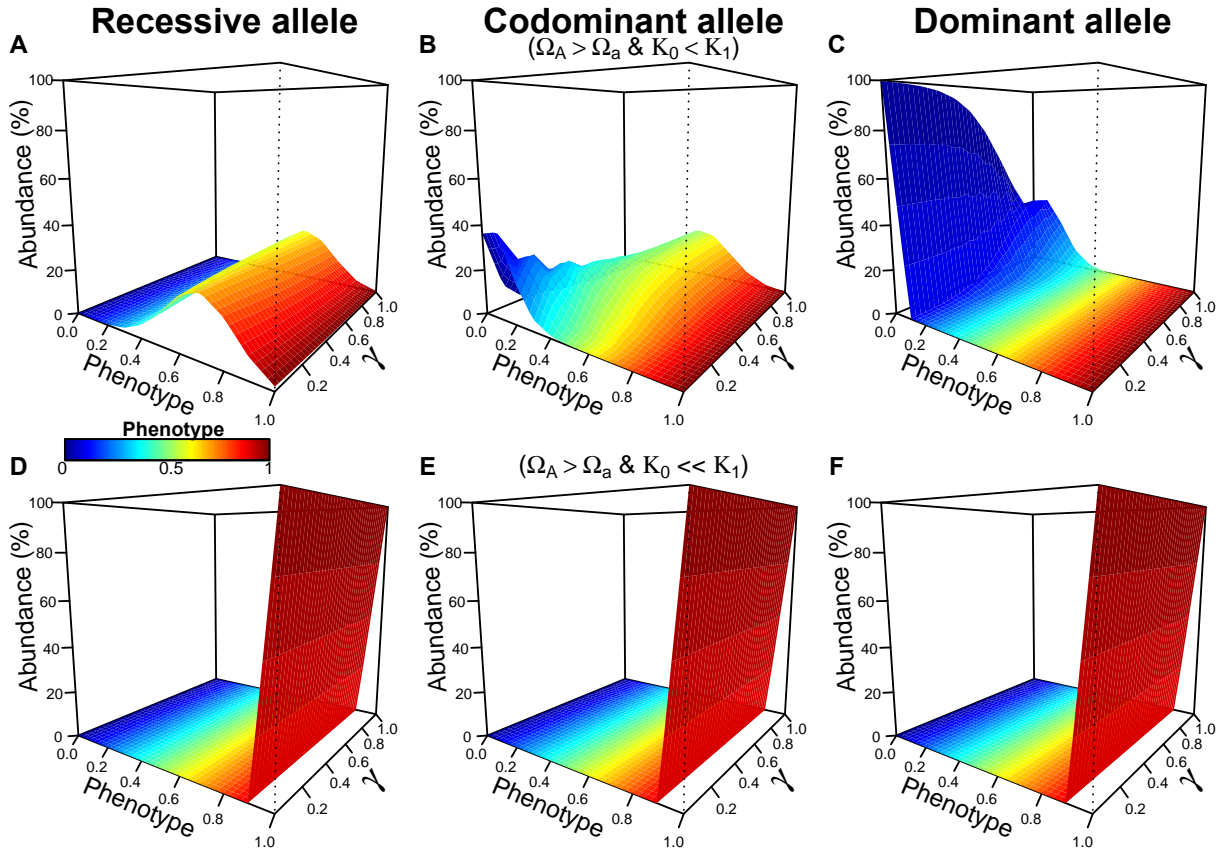

**Figure S3.** Effects of a deleterious allele "a" with fitness reduced by 30%. There is interspecific competition between parental taxa ( $\alpha_{01} = \alpha_{10} \neq 0$ ). The parental species with reduced allelic fitness (species of class 1) has higher or much higher carrying capacities than the other parental species (class 0) ( $K_1 = 1.5K_0$  and  $K_1 = 2K_0$ ). The results are obtained after 100 generations of independent evolution and 150 generations of genomic mixing (250 total generations).

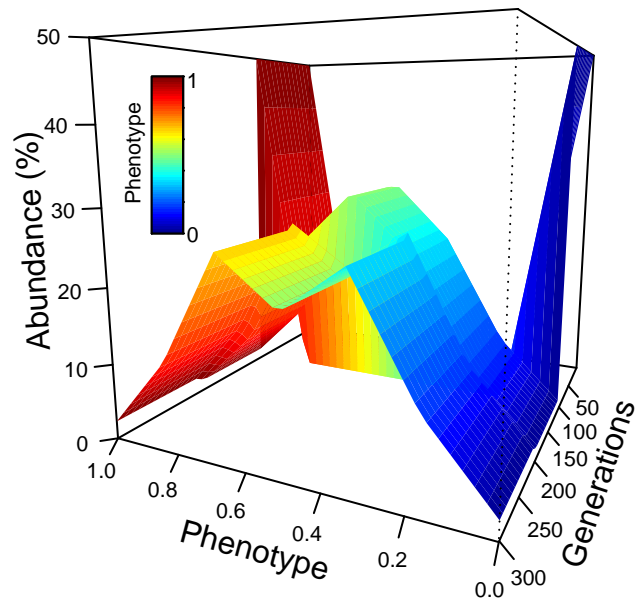

**Figure S4.** Forward simulations of the abundance of two parental species (classes 0 and 1), which have experienced independent evolution during 100 generations before hybridization starts. The interbreeding is panmictic ( $\gamma = 1$ ). A lethal genotype ("AaBbCc") appears in generation 200 ( $n_L = 3$ ).

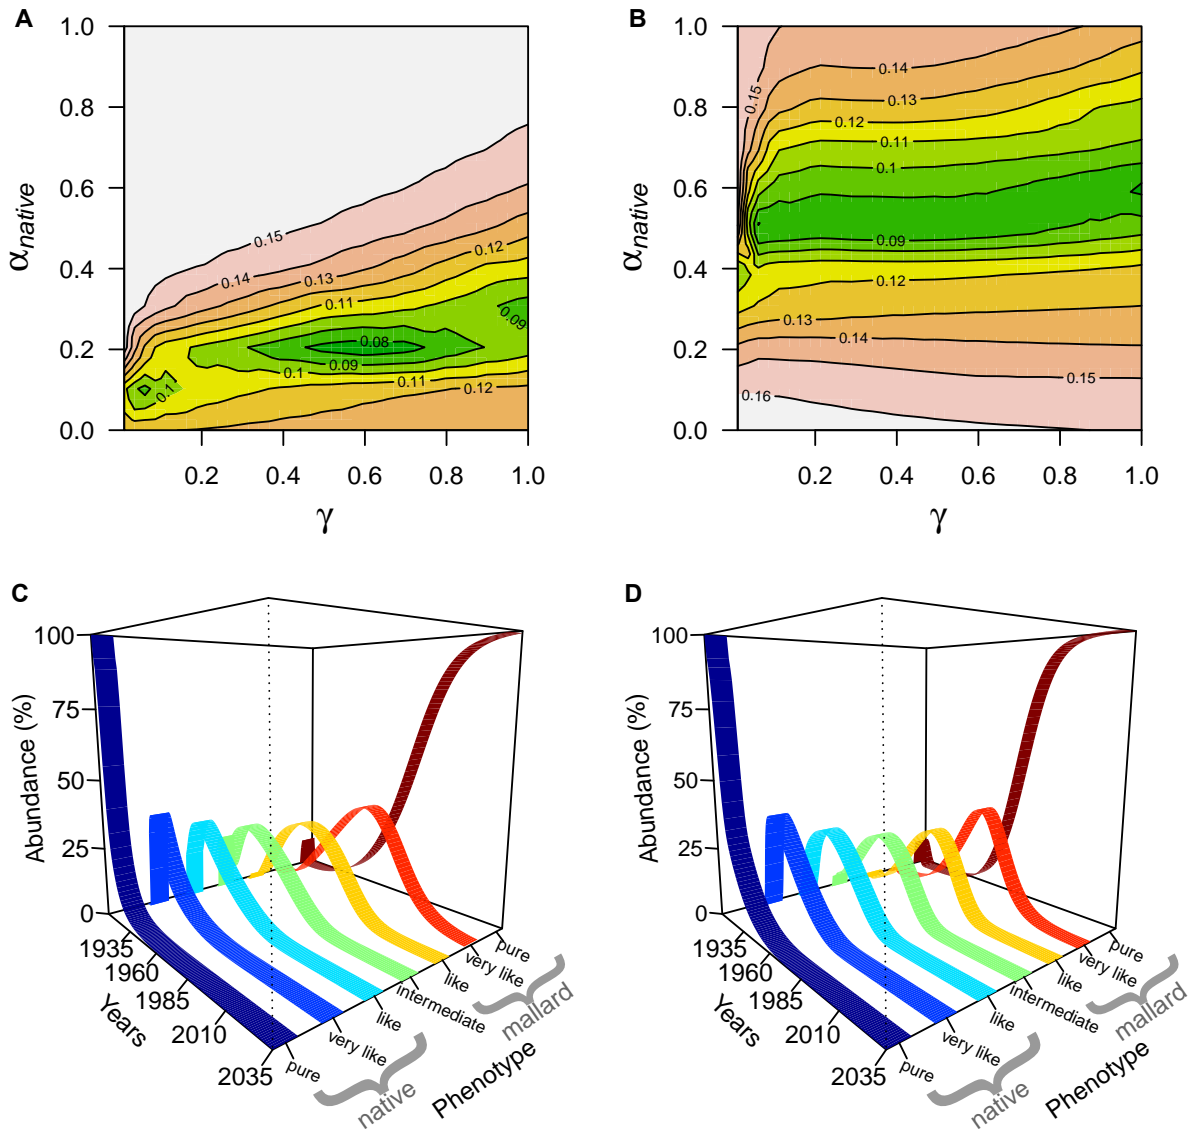

**Figure S5.** Parameter values and forward simulations when using alternative combinations of carrying capacities to explain the observed colonization of mallards (*Anas platyrhynchos*) in New Zealand. a) and c) carrying capacity of mallard 1.75 times larger than the one of the native species; b) and d) carrying capacity of mallard 1.5 times larger than the one of the native species.
